# Supplementary figures and images for: Repeated outbreaks drive the evolution of bacteriophage communication
Source: eLife journal article supplement (doi:10.7554/elife.58410), 2021-01-18

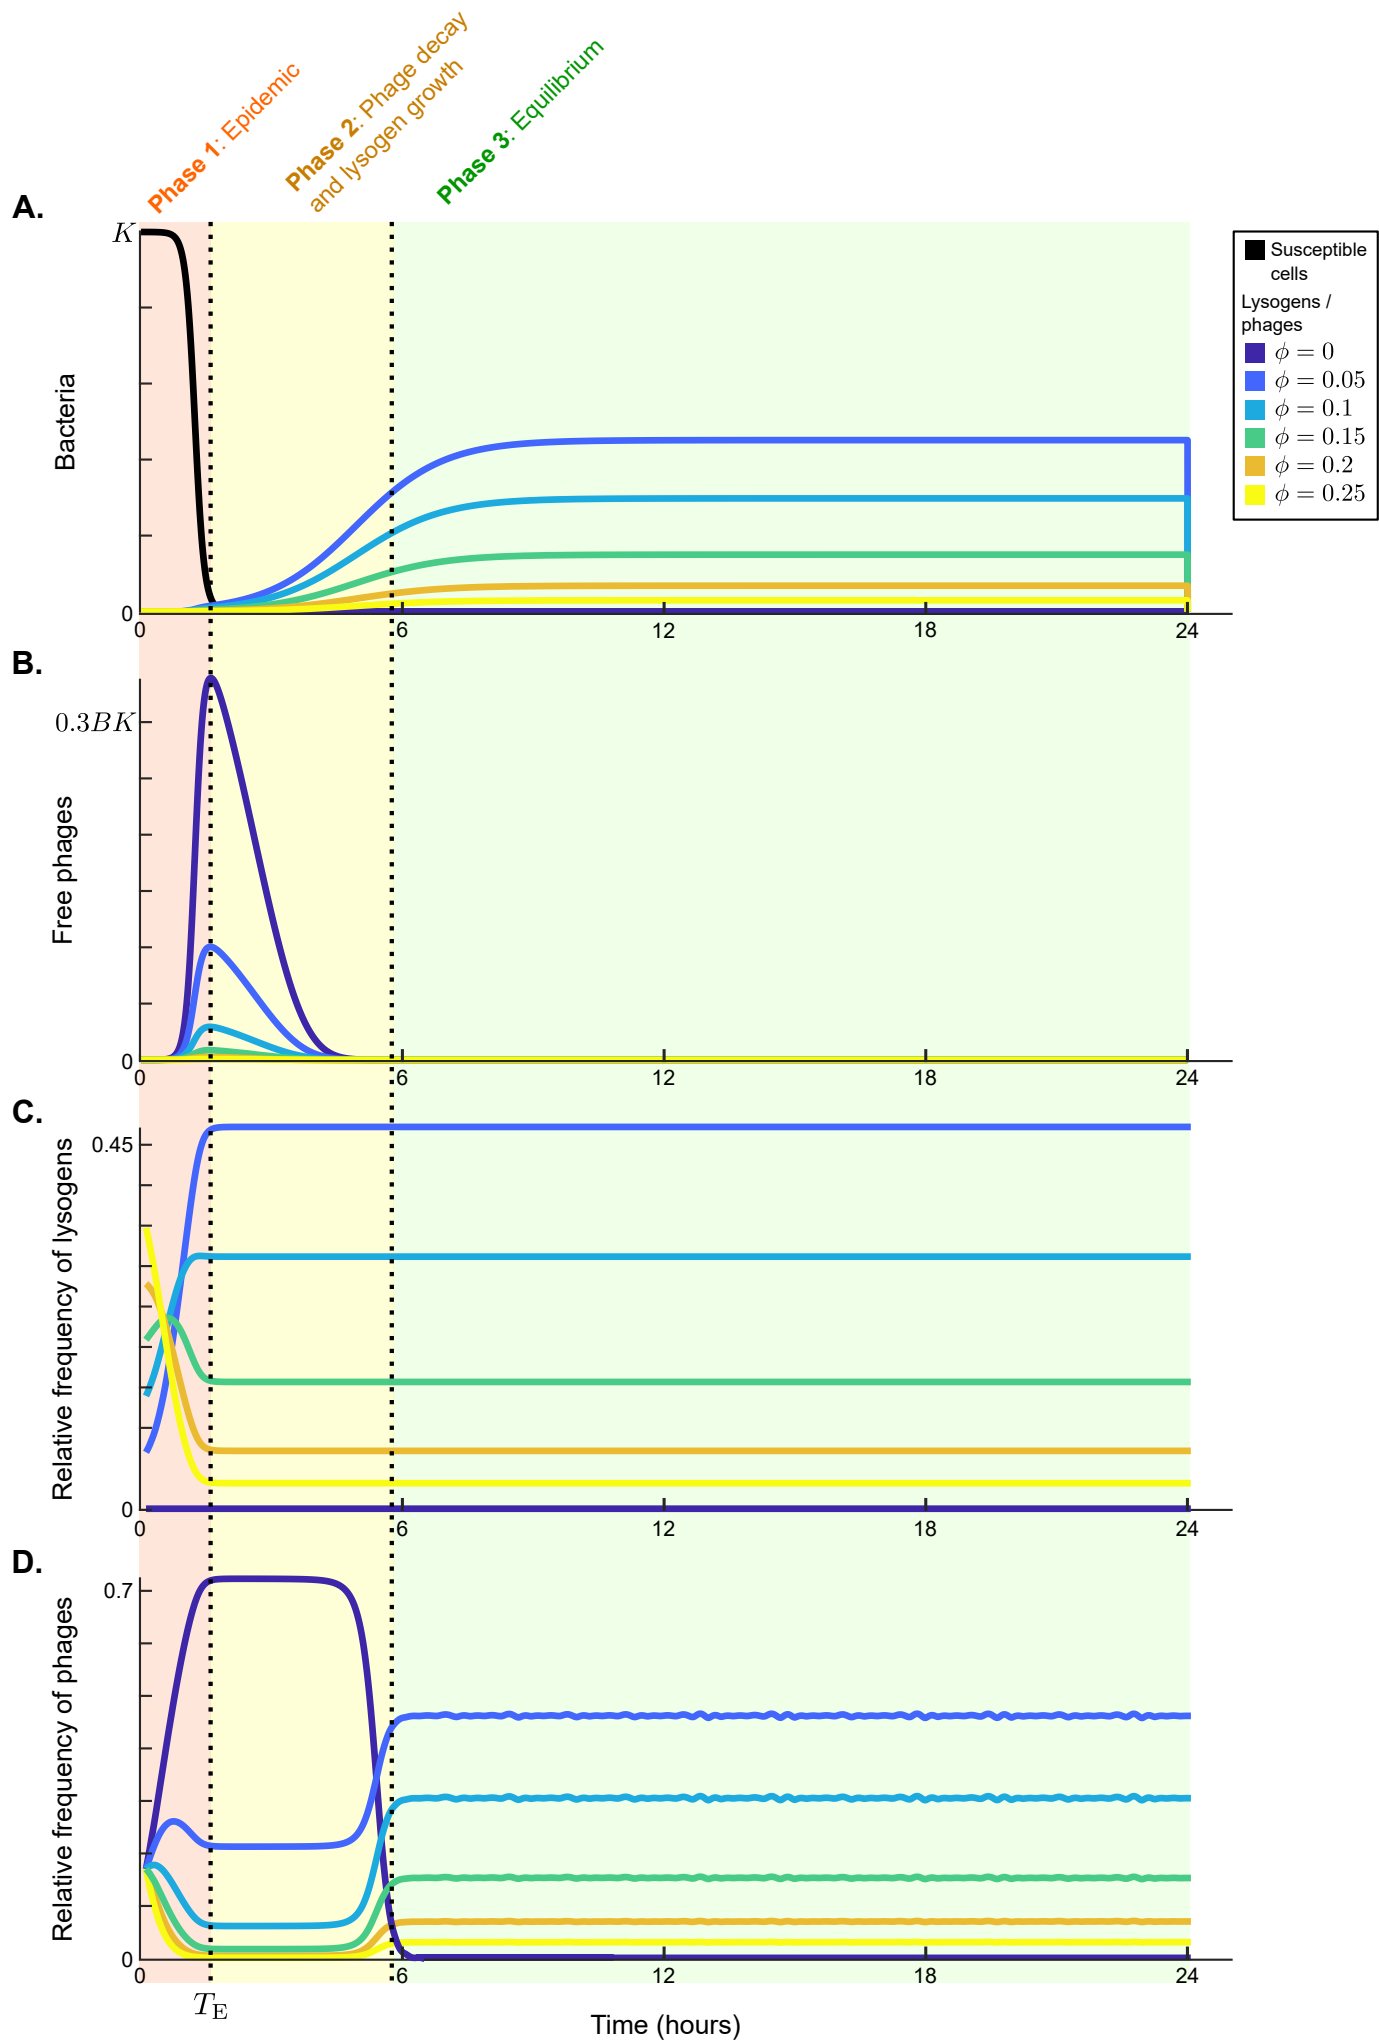

Supplement: supp [file elife_poa_e58410_Figure_2_figure_supplement_1.pdf › elife_poa_e58410_Figure_2_figure_supplement_1.pdf]

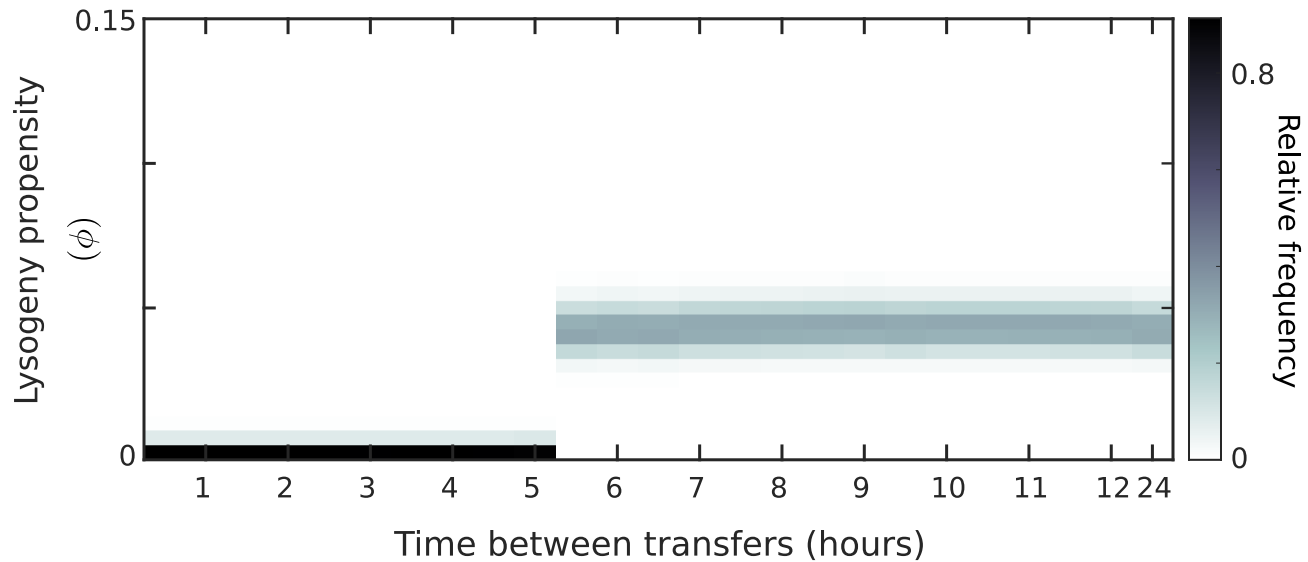

Supplement: supp [file elife_poa_e58410_Figure_2_figure_supplement_2.pdf › elife_poa_e58410_Figure_2_figure_supplement_2.pdf]

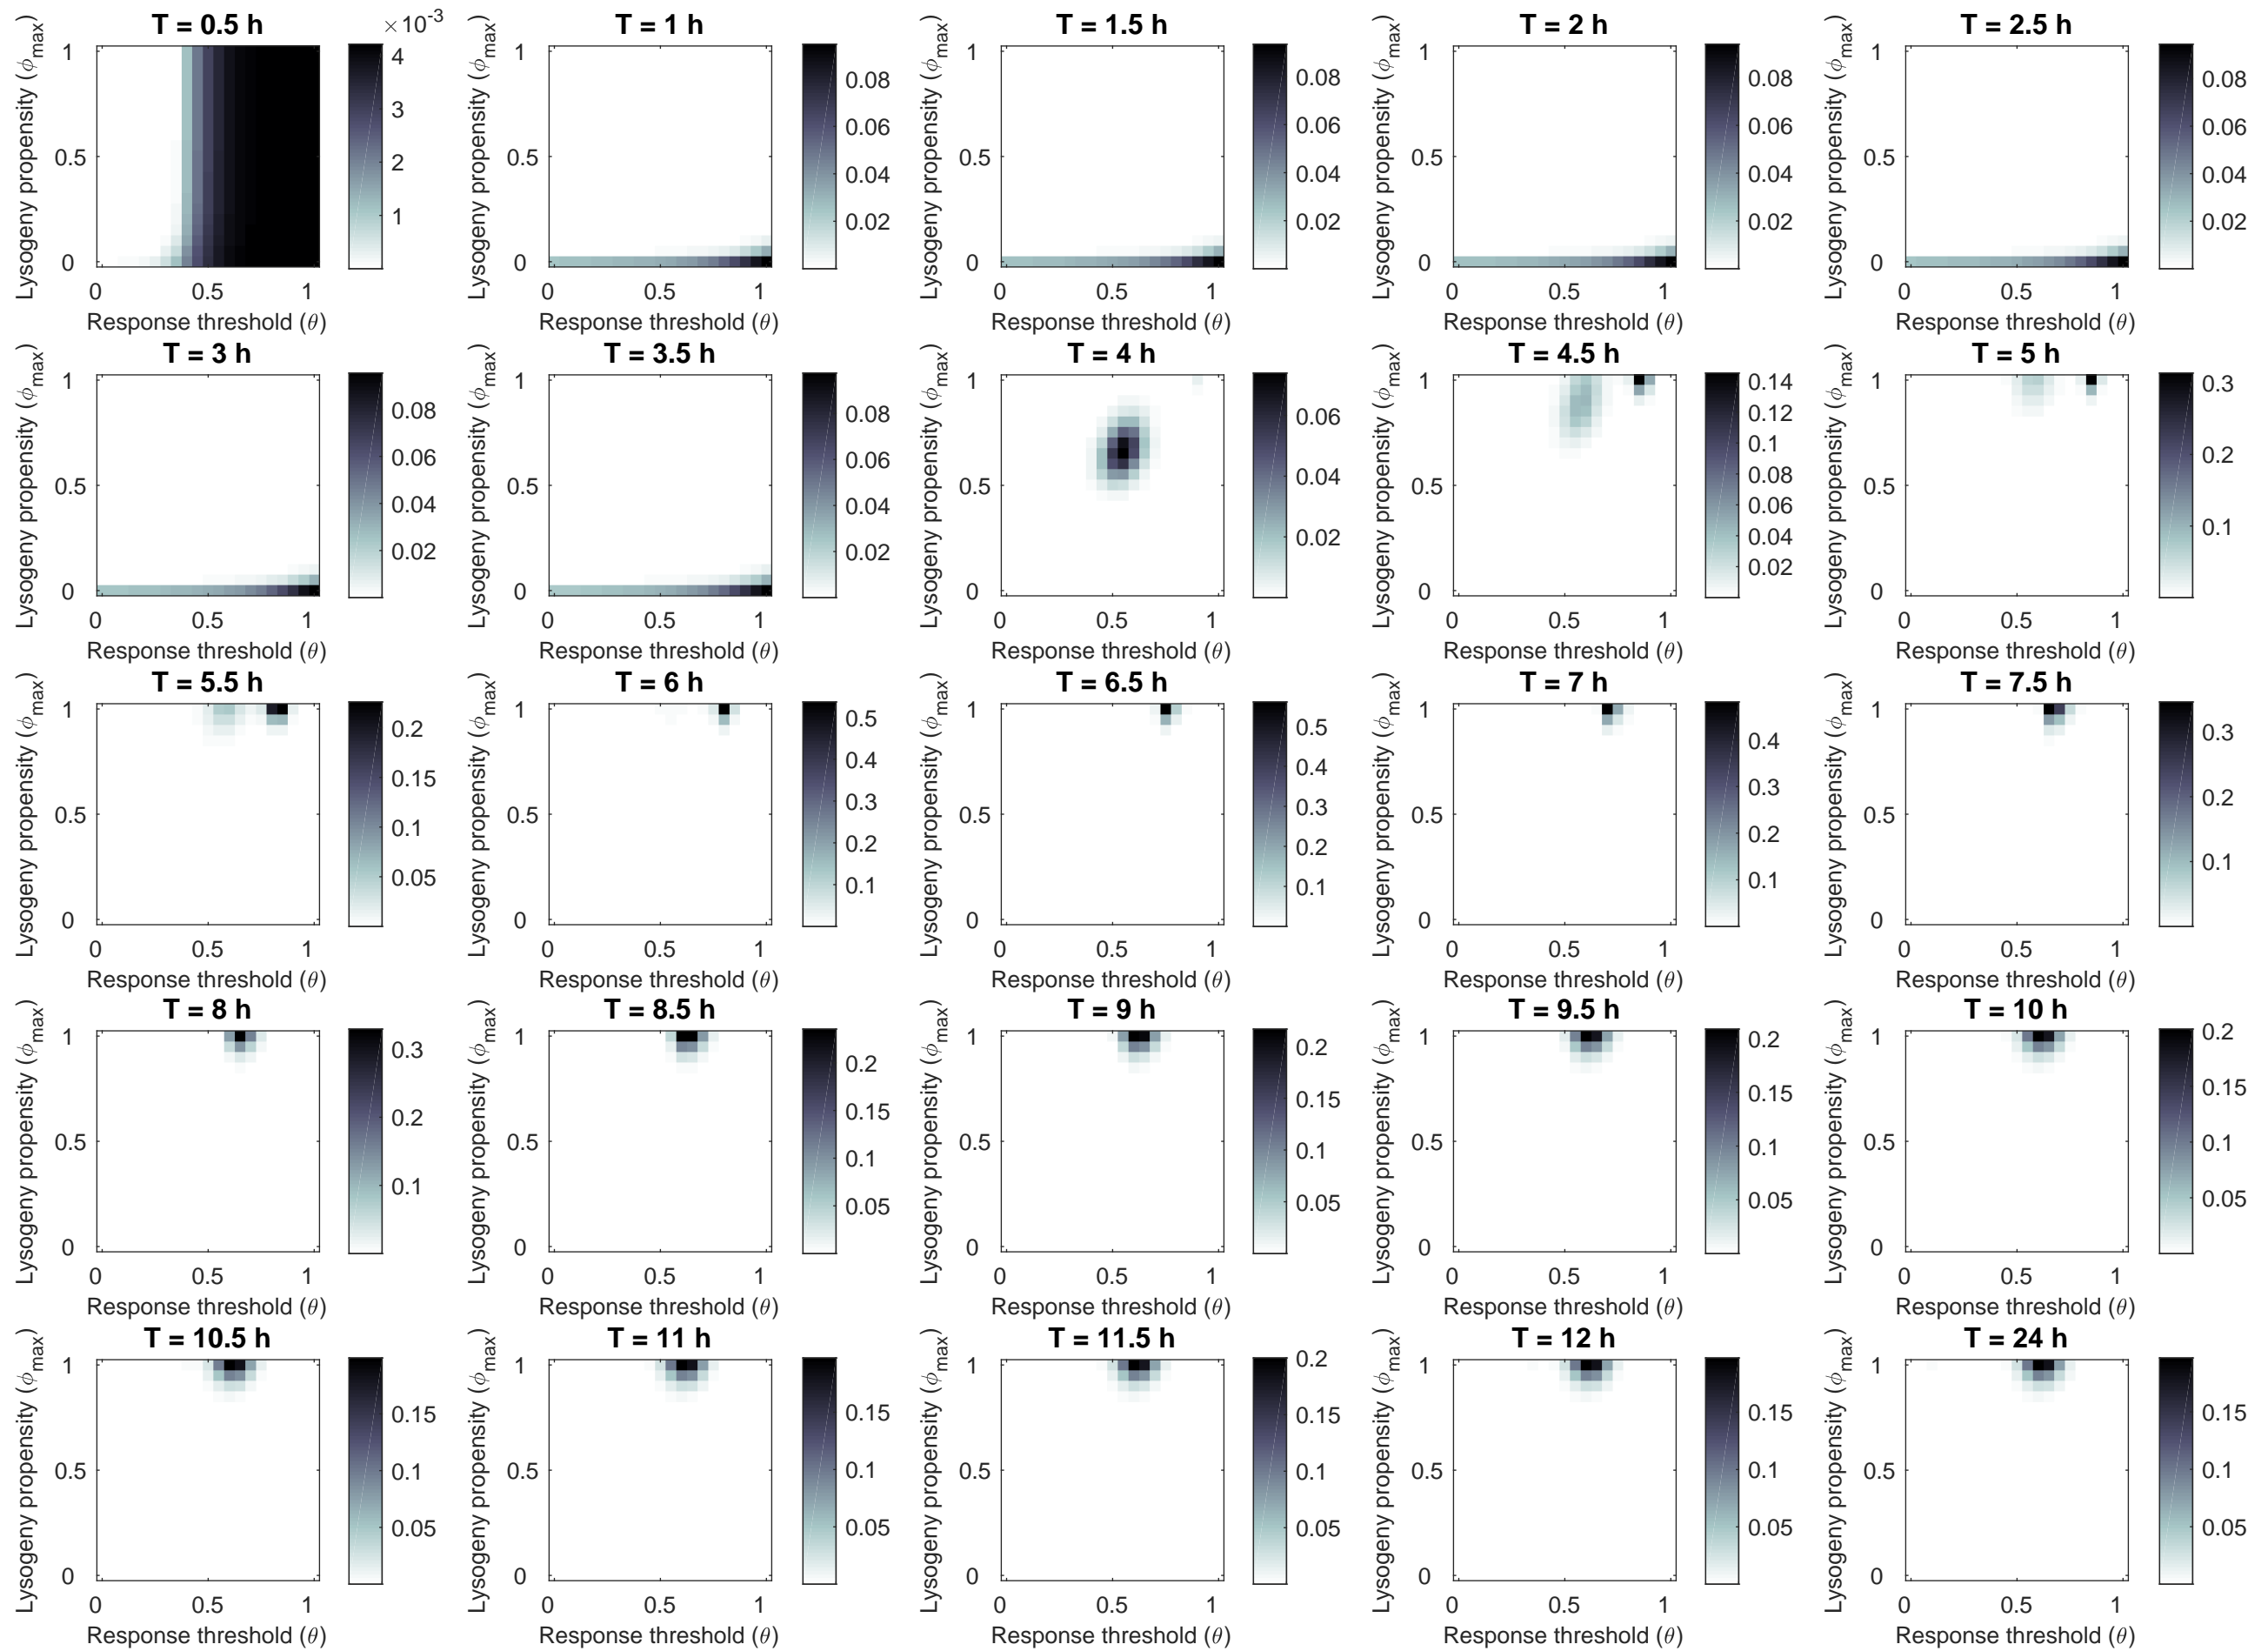

Supplement: supp [file elife_poa_e58410_Figure_3_figure_supplement_1.pdf › elife_poa_e58410_Figure_3_figure_supplement_1.pdf]

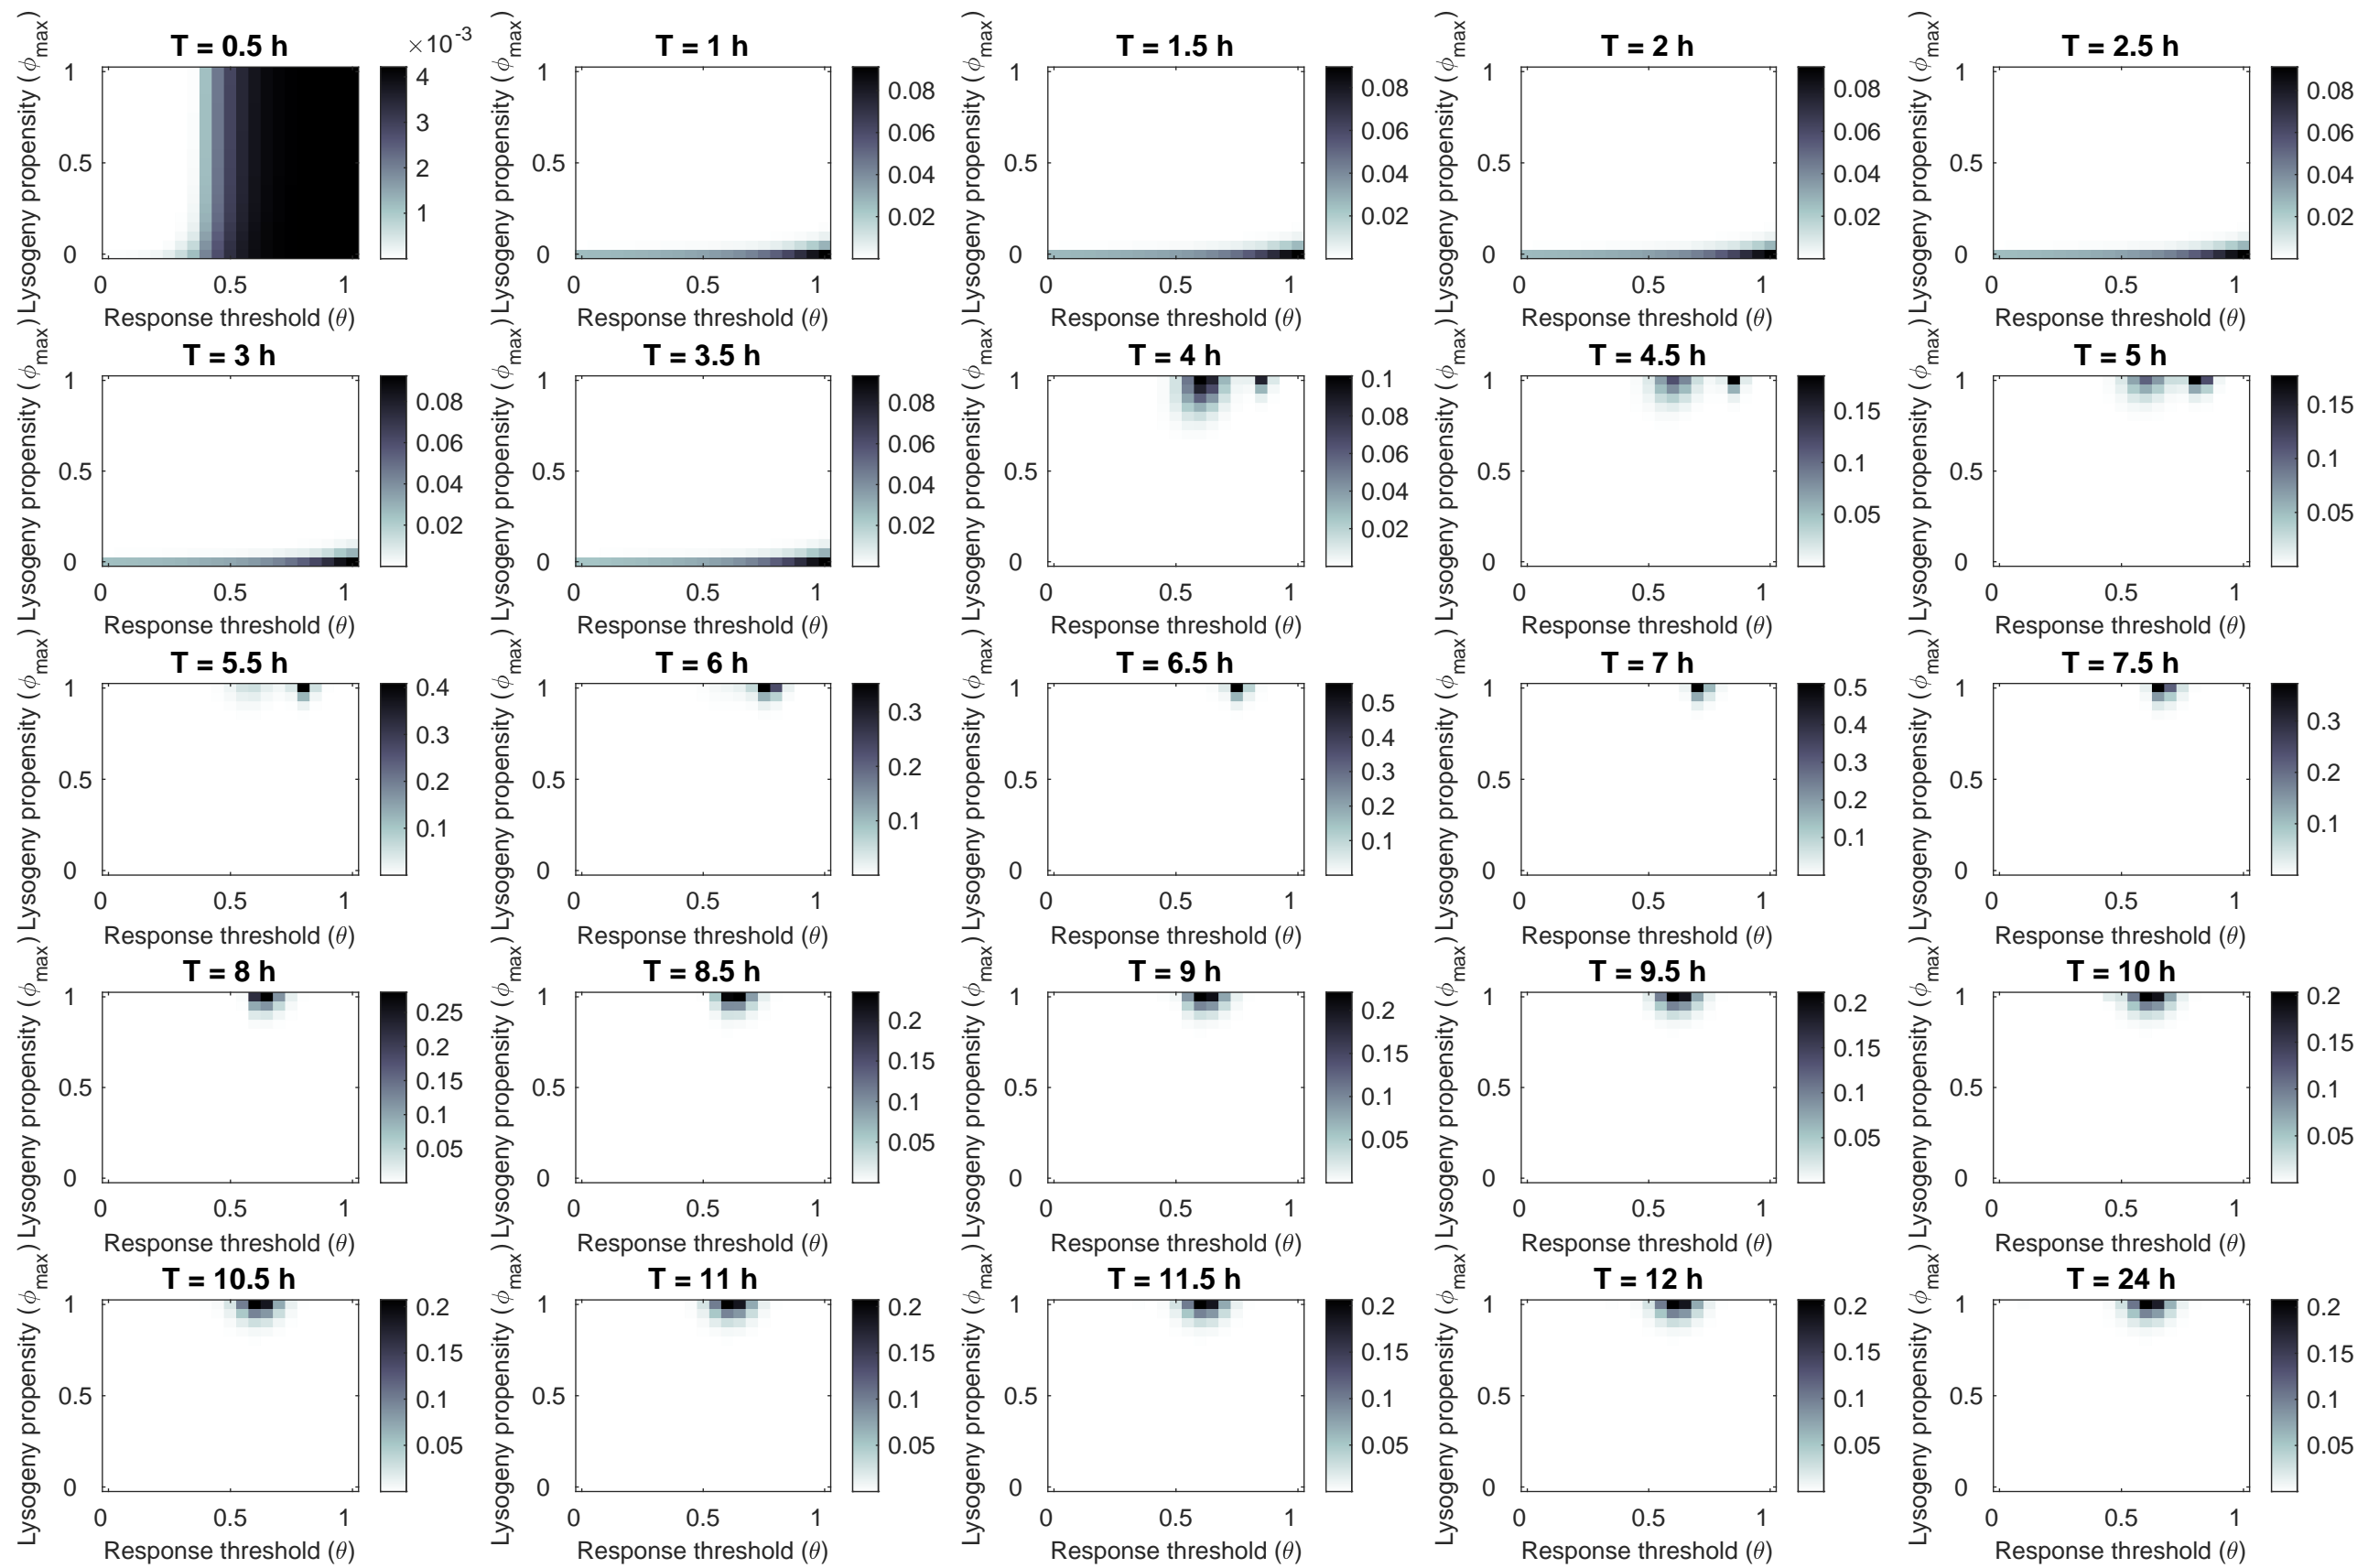

Supplement: supp [file elife_poa_e58410_Figure_3_figure_supplement_2.pdf › elife_poa_e58410_Figure_3_figure_supplement_2.pdf]

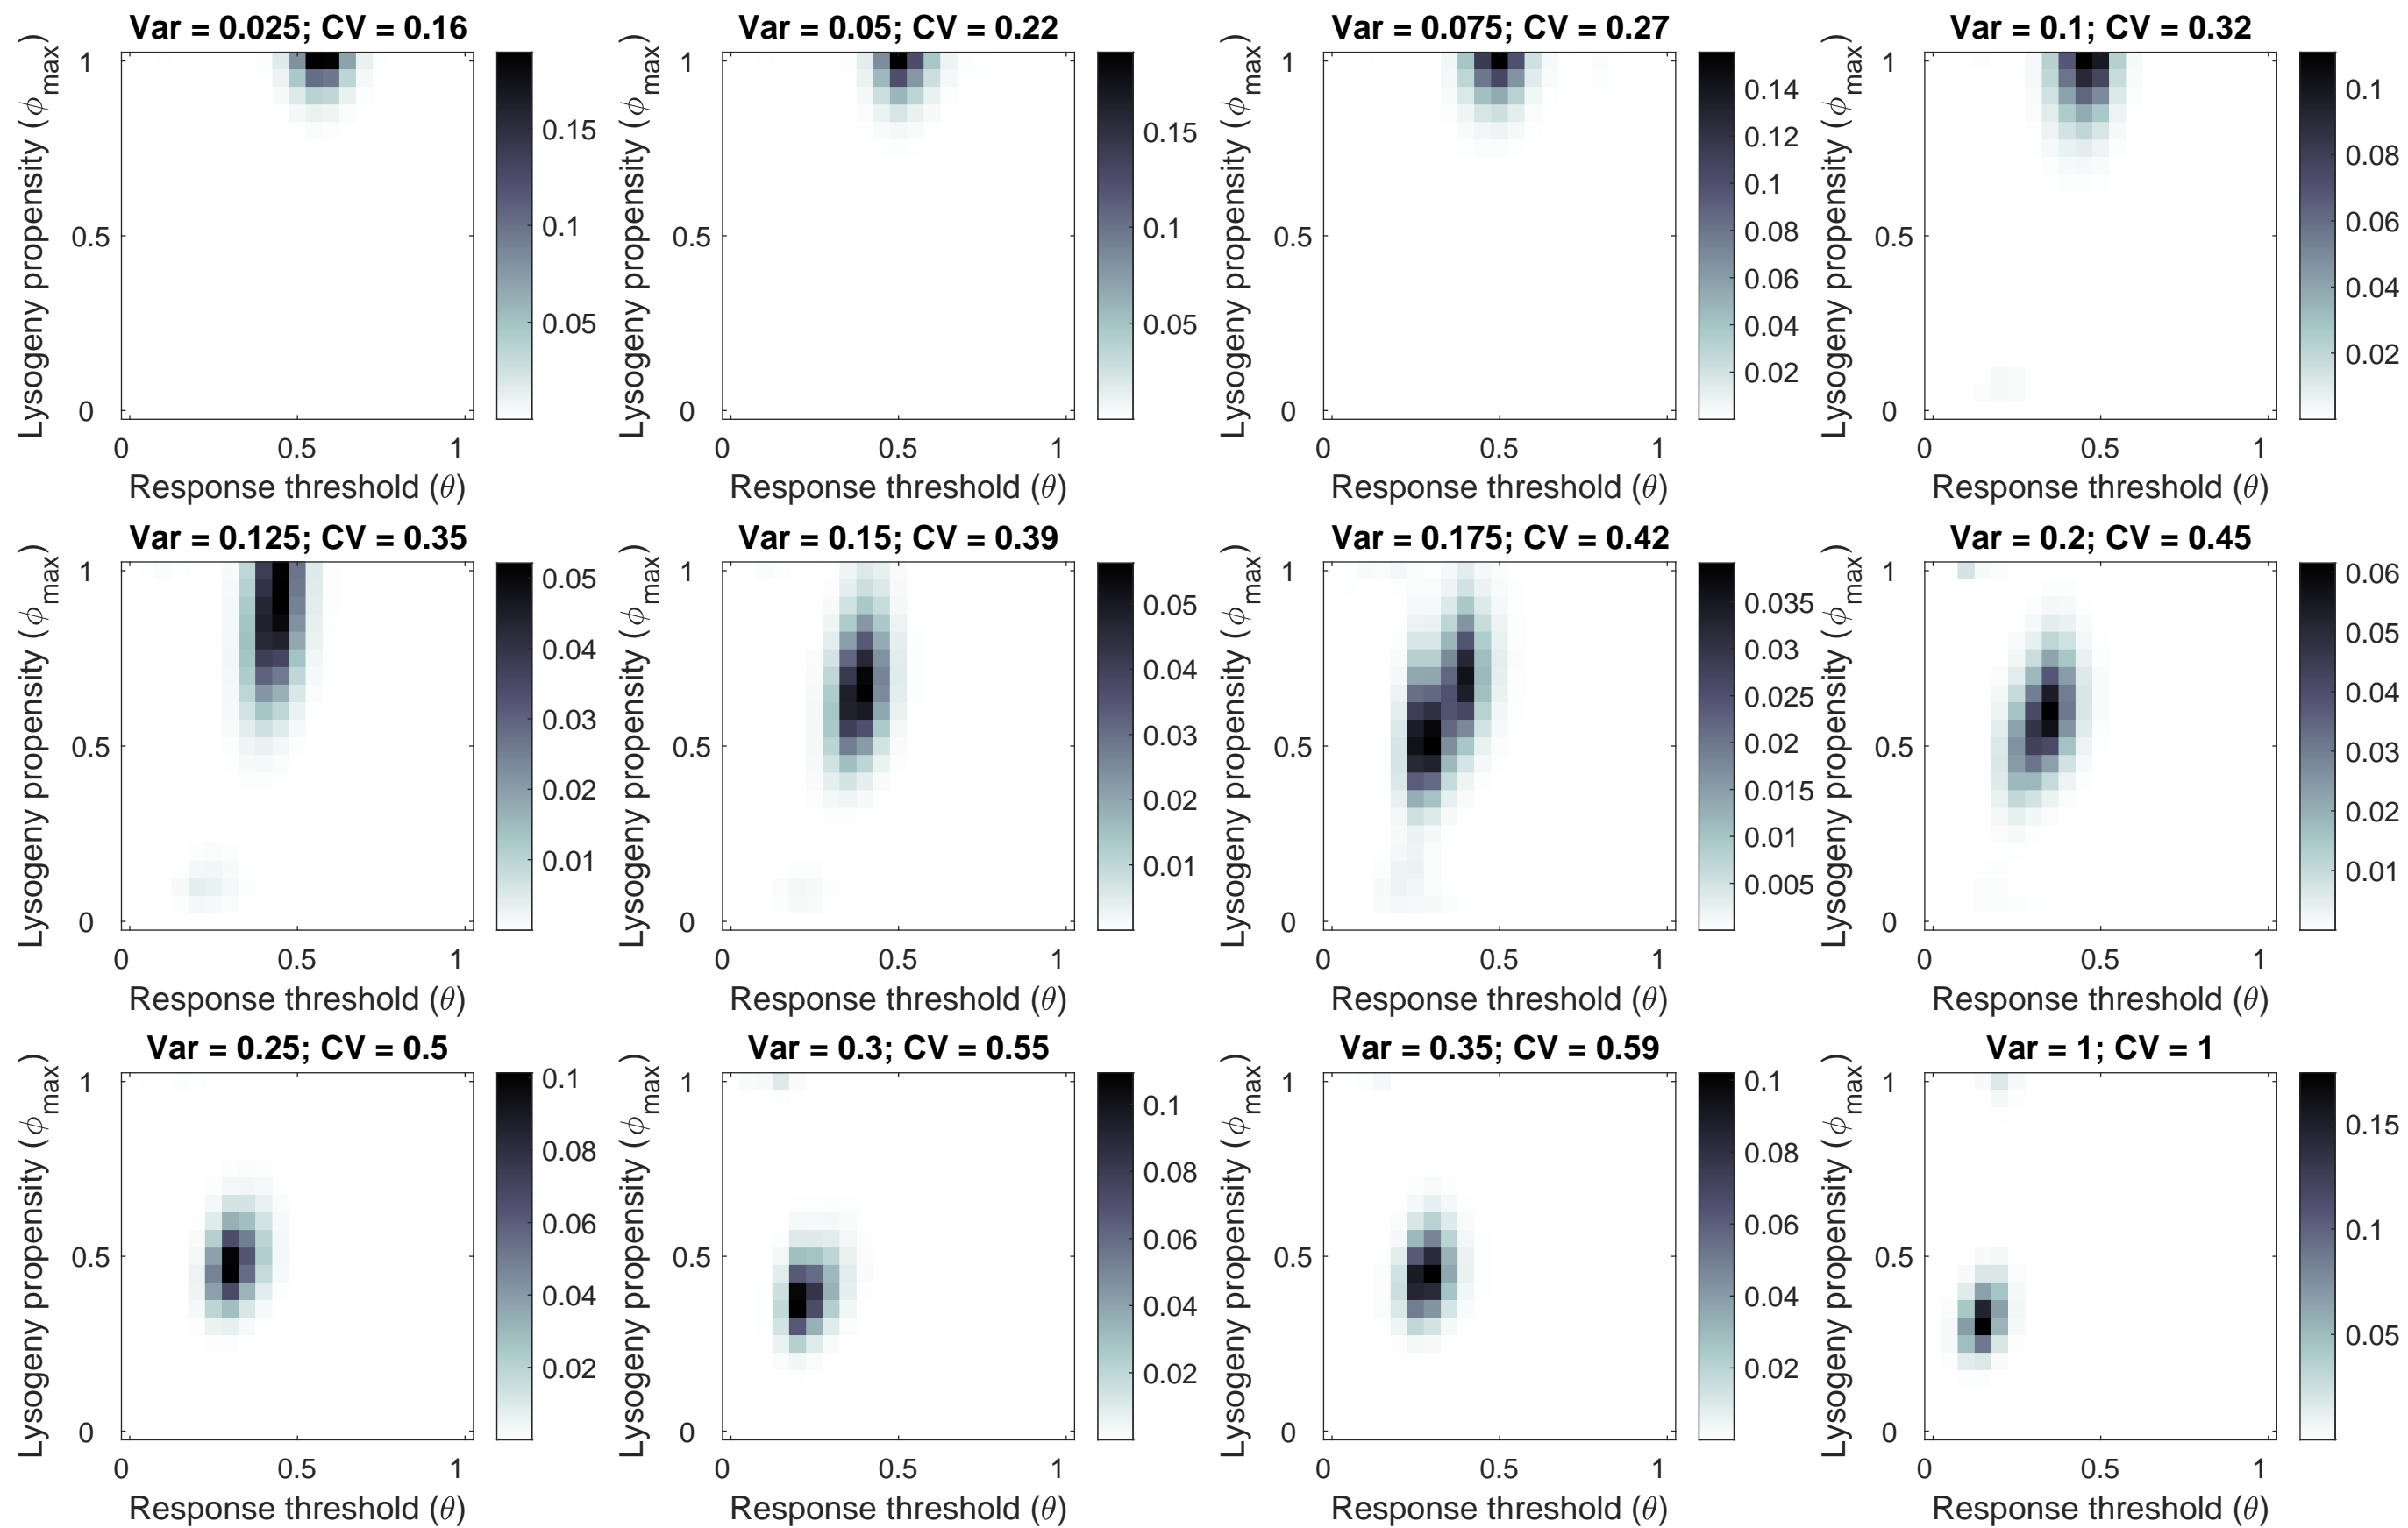

Supplement: supp [file elife_poa_e58410_Figure_5_figure_supplement_1.pdf › elife_poa_e58410_Figure_5_figure_supplement_1.pdf]
